# Supplementary material for: Rasch-Validated Italian Scale for Diagnosing Digital Eye Strain: The Computer Vision Syndrome Questionnaire IT©
Source: MDPI journal article supplement (doi:10.3390/ijerph19084506), 2022-04-08
Supplement: s1 [file s1]

*Da compilare a cura del lavoratore*

Indichi se percepisce qualcuno dei seguenti sintomi, durante l'utilizzo del computer nel lavoro.  
 Per ogni sintomo, segni con una X:

- a. In primo luogo, la frequenza con la quale appare il sintomo, tenendo conto che:  
 MAI = in nessuna occasione  
 OCCASIONALMENTE = in forma sporadica o una volta alla settimana  
 DI SOLITO O SEMPRE = 2 o 3 volte alla settimana o quasi tutti i giorni
- b. In secondo luogo, l'intensità con la quale sente il sintomo:  
 Ricordi: se segnala "MAI" in frequenza, non deve compilare l'intensità.

|                                              | a. Frequenza |                 |                    | b. Intensità |         |
|----------------------------------------------|--------------|-----------------|--------------------|--------------|---------|
|                                              | MAI          | OCCASIONALMENTE | DI SOLITO O SEMPRE | MODERATA     | INTENSA |
| 1. Bruciore                                  |              |                 |                    |              |         |
| 2. Pizzicore                                 |              |                 |                    |              |         |
| 3. Sensazione di corpo estraneo              |              |                 |                    |              |         |
| 4. Lacrimazione                              |              |                 |                    |              |         |
| 5. Ammiccamento eccessivo                    |              |                 |                    |              |         |
| 6. Arrossamento oculare                      |              |                 |                    |              |         |
| 7. Dolore oculare                            |              |                 |                    |              |         |
| 8. Pesantezza delle palpebre                 |              |                 |                    |              |         |
| 9. Secchezza                                 |              |                 |                    |              |         |
| 10. Visione sfuocata                         |              |                 |                    |              |         |
| 11. Visione doppia                           |              |                 |                    |              |         |
| 12. Difficoltà nella messa a fuoco da vicino |              |                 |                    |              |         |
| 13. Aumento di sensibilità alla luce         |              |                 |                    |              |         |
| 14. Aloni di colori intorno agli oggetti     |              |                 |                    |              |         |
| 15. Sensazione di vedere peggio              |              |                 |                    |              |         |
| 16. Mal di testa                             |              |                 |                    |              |         |

Calcolo del PUNTEGGIO TOTALE considerando che:

• Frequenza:

- MAI = 0
- OCCASIONALMENTE = 1
- DI SOLITO O SEMPRE = 2

• Gravità:

- Il risultato di frequenza per intensità deve essere ricodificato come: 0 = 0; 1 o 2 = 1; 4 = 2

• Intensità:

- MODERATA = 1
- INTENSA = 2

|                                              | Frequenza | Intensità | Frequenza x Intensità | Gravità |
|----------------------------------------------|-----------|-----------|-----------------------|---------|
| 1. Bruciore                                  |           |           |                       |         |
| 2. Pizzicore                                 |           |           |                       |         |
| 3. Sensazione di corpo estraneo              |           |           |                       |         |
| 4. Lacrimazione                              |           |           |                       |         |
| 5. Ammiccamento eccessivo                    |           |           |                       |         |
| 6. Arrossamento oculare                      |           |           |                       |         |
| 7. Dolore oculare                            |           |           |                       |         |
| 8. Pesantezza delle palpebre                 |           |           |                       |         |
| 9. Secchezza                                 |           |           |                       |         |
| 10. Visione sfuocata                         |           |           |                       |         |
| 11. Visione doppia                           |           |           |                       |         |
| 12. Difficoltà nella messa a fuoco da vicino |           |           |                       |         |
| 13. Aumento di sensibilità alla luce         |           |           |                       |         |
| 14. Aloni di colori intorno agli oggetti     |           |           |                       |         |
| 15. Sensazione di vedere peggio              |           |           |                       |         |
| 16. Mal di testa                             |           |           |                       |         |

$$\text{Punteggio totale} = \sum_{i=1}^{16}$$

Se il punteggio totale è  $\geq 7$  punti, il lavoratore è affetto da Sindrome da Visione al Compute (Computer Vision Syndrome).
